# Supplementary material
Source: ML conference proceedings conference paper supplement (https://proceedings.neurips.cc/paper_files/paper/2022/hash/71b17f00017da0d73823ccf7fbce2d4f-Abstract.html)
Supplement: Supplementary file 1 [file 71b17f00017da0d73823ccf7fbce2d4f-Supplemental-Conference.pdf]

## A Missing Proofs in Section 4

**Lemma A.1.** For a given graph  $G(\mathbb{V}, \mathbb{E}, w)$ , let  $G'$  be the induced subgraph of  $G$  with vertex set  $\mathbb{V} \setminus S$ . For any pair  $\{(u, v) | u \in \mathbb{V} \setminus S, v \in S\}$ : 1) if the shortest path between  $u$  and  $v$  does not pass other nodes in  $S$ , then there exist a neighbor  $p$  of  $v$  such that  $d_G(u, v) = d_{G'}(u, p) + w(p, v)$ ; 2) if the shortest path  $P_{u,v}$  between  $u$  and  $v$  does pass other nodes in  $S$  except  $v$ , then there exist vertices  $p \in S, p' \notin S$  such that  $d_G(u, v) = d_G(u, p) + d_G(p, v)$  and  $d_G(u, p) = d_{G'}(u, p') + w(p', p)$ .

*Proof.* 1) Note that the shortest path between  $u$  and  $v$  does not pass other nodes in  $S$  except  $v$ . Let the second last vertex from  $u$  to  $v$  be  $p$ , with  $p \notin S$ . Then we have  $d_G(u, p) = d_{G'}(u, p)$ , thus  $d_G(u, v) = d_G(u, p) + w(p, v) = d_{G'}(u, p) + w(p, v)$ . 2) Let  $p$  be the first vertex in  $S$  that  $P_{u,v}$  passes through, and denote  $p'$  as the vertex just before  $p$  in path  $P_{u,v}$ . We have that  $d_G(u, p') = d_{G'}(u, p')$ . Then we know that  $d_G(u, v) = d_G(u, p) + d_G(p, v)$  and  $d_G(u, p) = d_{G'}(u, p') + w(p', p)$ .  $\square$

### A.1 Proof of Lemma 4.1

*Proof.* The privacy budget  $\epsilon$  is divided into three parts:

(Part 1) For the distances between all pairs in  $\mathbb{V} \setminus S$ , our method achieves  $(\epsilon', 0)$ -DP by the result on trees from (Sealfon, 2016).

(Part 2) For the  $k^2$  distances of all node pairs in  $S$ , by adding to each edge weights i.i.d.  $Lap(0, \sigma_1)$  noises with  $\sigma_1 = \sqrt{8n \log(1/\delta)}/\epsilon' = 2\sqrt{2}n^{1/2} \sqrt{\log(1/\delta)}/\epsilon'$ , we can achieve  $(\epsilon', \delta)$ -DP according to Lemma 2.2.

(Part 3) For each edge  $(u, v)$  with  $u \in \mathbb{V} \setminus S, v \in S$ , obviously by Laplace mechanism  $w'(u, v) := w(u, v) + Lap(1/\epsilon')$ , we achieve  $(\epsilon', 0)$ -DP to release all the pairwise distances.

Composing three privacy budgets up and using simple composition theorem of DP, we show that Algorithm 2 achieves  $(\epsilon, \delta)$ -DP.  $\square$

### A.2 Proof of Theorem 4.2

**Lemma A.2** (All pairwise distance on trees (Sealfon, 2016)). For a tree  $T$  with non-negative edge weights  $w$  and  $\epsilon > 0$ , there is an  $\epsilon$ -differentially private algorithm that releases APSP distances such that with probability  $1 - \gamma$ , all released distances have approximation error bounded  $O(\log^{2.5} n \log(1/\gamma)/\epsilon)$ .

*Proof.* (of Theorem 4.2) For  $u \in S, v \in S$ , by adding  $d(u, v)$  with  $Lap(0, \sigma_1)$  noise where  $\sigma_1 = 2\sqrt{2}n^{1/2} \sqrt{\log(1/\delta)}/\epsilon'$ , with probability  $1 - \gamma$ ,  $|\hat{d}(u, v) - d(u, v)| = O(k \sqrt{\log(1/\delta)} \log(k/\gamma)) \forall u, v \in S$ . Based on Lemma A.2, we have that with probability  $1 - \gamma$ , all released distances in  $G'$  have approximation error  $O(\log^{2.5} n \log(1/\gamma)/\epsilon)$ . For those edges  $(u, v)$  with  $u \in \mathbb{V} \setminus S, v \in S$ , we add to each  $w(u, v)$  a Laplace noise according to  $Lap(0, \sigma_0)$  with  $\sigma_0 = 1/\epsilon'$ . Thus, with another probability  $1 - \gamma$ ,  $|w'(u, v) - w(u, v)| \leq O(\log(n/\gamma)/\epsilon) \forall \{u \in \mathbb{V} \setminus S, v \in S\}$ . Union bound implies that, with probability  $1 - 3\gamma$ , the total error is bounded by  $O(\epsilon^{-1} k \log(k/\gamma) \sqrt{\log(1/\delta)}) + O(\epsilon^{-1} (\log^{2.5} n) \log(1/\gamma))$  as claimed.  $\square$
